# Supplementary material
Source: PubMed Central journal article supplement (PMC3520530)

## Supplementary Material

**Table 1S.** Mean and standard deviation (SD) of age and of anthropometric and metabolic parameters of the healthy population studied separated by gender.

### Males:

| Variable                 | Mean   | SD    | Variable           | Mean   | SD     |
|--------------------------|--------|-------|--------------------|--------|--------|
| Age (years)              | 56.70  | 11.57 | TC (mg/dL)         | 194.83 | 28.99  |
| BMI (kg/m <sup>2</sup> ) | 26.37  | 4.22  | TG (mg/dL)         | 94.19  | 43.72  |
| Waist C. (cm)            | 94.00  | 10.68 | HDL-C (mg/dL)      | 47.15  | 11.67  |
| Hip C. (cm)              | 97.46  | 9.57  | LDL-C (mg/dL)      | 128.85 | 27.06  |
| Waist/Hip Ratio          | 0.97   | 0.07  | ApoB (mg/dL)       | 92.30  | 21.92  |
| SBP (mmHg)               | 135.04 | 15.25 | ApoA1 (mg/dL)      | 155.41 | 34.20  |
| DBP (mmHg)               | 81.07  | 8.01  | Lp(a) (mg/dL)      | 8.92*  | 15.32* |
| PP (mmHg)                | 53.96  | 11.23 | FPG (mg/dL)        | 101.61 | 11.14  |
| MAP (mmHg)               | 99.06  | 9.61  | SUA (mg/dL)        | 5.88   | 1.27   |
| HR (bpm)                 | 58.42  | 8.87  | Creatinine (mg/dL) | 1.04   | 0.12   |

### Females:

| Variable                 | Mean   | SD    | Variable           | Mean   | SD     |
|--------------------------|--------|-------|--------------------|--------|--------|
| Age (years)              | 54.60  | 11.38 | TC (mg/dL)         | 210.73 | 30.30  |
| BMI (kg/m <sup>2</sup> ) | 25.10  | 4.95  | TG (mg/dL)         | 85.86  | 38.06  |
| Waist C. (cm)            | 84.81  | 12.62 | HDL-C (mg/dL)      | 53.34  | 10.37  |
| Hip C. (cm)              | 95.08  | 12.14 | LDL-C (mg/dL)      | 140.22 | 26.56  |
| Waist/Hip Ratio          | 0.89   | 0.08  | ApoB (mg/dL)       | 98.06  | 23.87  |
| SBP (mmHg)               | 131.78 | 18.00 | ApoA1 (mg/dL)      | 168.97 | 31.72  |
| DBP (mmHg)               | 78.26  | 8.30  | Lp(a) (mg/dL)      | 7.99*  | 14.09* |
| PP (mmHg)                | 53.53  | 15.46 | FPG (mg/dL)        | 95.02  | 9.04   |
| MAP (mmHg)               | 96.10  | 10.04 | SUA (mg/dL)        | 4.23   | 0.92   |
| HR (bpm)                 | 66.33  | 10.41 | Creatinine (mg/dL) | 0.83   | 0.12   |

BMI, Body Mass Index; Waist C, Waist circumference; Hip C, Hip circumference; SBP, Systolic Blood Pressure; DBP, Diastolic Blood Pressure; PP, Pulse Pressure; MAP, Mean Arterial Pressure; HR, Heart Rate; TC, Total Cholesterol; TG, Triglycerides; HDL-C, High Density Lipoprotein Cholesterol; LDL-C, Low Density Lipoprotein Cholesterol; ApoB, Apolipoprotein B; ApoAI,

Apolipoprotein AI; Lp(a), Lipoprotein(a); FPG, Fasting Plasma Glucose; SUA, Serum Uric Acid.

\*Lp(a) levels are expressed as median (interquartile range) because of its asymmetric distribution.

**Table 2S** – Linear regression with nested design. Coefficients for the association between carotid-femoral Pulse Wave Velocity (cfPWV) and other parameters in the healthy population studied separated by gender.

**Males:**

|                               | Model 1 |       |       | Model 2 |       |       | Model 3 |       |       | Model 4 |       |       |
|-------------------------------|---------|-------|-------|---------|-------|-------|---------|-------|-------|---------|-------|-------|
|                               | Coeff.  | SE    | p-val |
| <i>Age</i>                    | 0.067   | 0.015 | 0.000 | 0.061   | 0.015 | 0.000 | 0.061   | 0.016 | 0.001 | 0.059   | 0.015 | 0.000 |
| <i>Risk Factors</i>           |         |       |       |         |       |       |         |       |       |         |       |       |
| BMI                           |         |       |       | 0.052   | 0.041 | 0.206 | 0.053   | 0.045 | 0.236 | 0.044   | 0.042 | 0.309 |
| MAP                           |         |       |       | 0.057   | 0.016 | 0.001 | 0.057   | 0.016 | 0.001 | 0.057   | 0.017 | 0.002 |
| FPG                           |         |       |       | -0.008  | 0.016 | 0.628 | -0.008  | 0.016 | 0.631 | -0.006  | 0.016 | 0.683 |
| LDL-C                         |         |       |       | -0.009  | 0.006 | 0.110 | -0.009  | 0.006 | 0.112 | -0.009  | 0.006 | 0.137 |
| <i>Efflux parameter</i>       |         |       |       |         |       |       |         |       |       |         |       |       |
| HDL-C                         |         |       |       |         |       |       | 0.002   | 0.016 | 0.893 | 0.001   | 0.017 | 0.971 |
| ABCA1-CEC                     |         |       |       |         |       |       |         |       |       | -0.257  | 0.179 | 0.158 |
| Constant                      | 3.877   | 0.798 | 0.000 | -0.884  | 2.629 | 0.738 | -1.013  | 2.927 | 0.731 | 0.334   | 3.015 | 0.912 |
| Observations                  | 54      |       |       | 54      |       |       | 54      |       |       | 54      |       |       |
| R <sup>2</sup> <sub>adj</sub> | 0.272   |       |       | 0.381   |       |       | 0.368   |       |       | 0.444   |       |       |
| Log-likelihood                | -87.0   |       |       | -80.4   |       |       | -80.4   |       |       | -78.8   |       |       |
| LR test (p-value)             | <0.001  |       |       | 0.011   |       |       | 0.878   |       |       | 0.075   |       |       |

**Females:**

|                               | Model 1 |       |       | Model 2 |       |       | Model 3 |       |       | Model 4 |       |       |
|-------------------------------|---------|-------|-------|---------|-------|-------|---------|-------|-------|---------|-------|-------|
|                               | Coeff.  | SE    | p-val |
| <i>Age</i>                    | 0.055   | 0.010 | 0.000 | 0.034   | 0.008 | 0.000 | 0.034   | 0.009 | 0.000 | 0.033   | 0.009 | 0.000 |
| <i>Risk Factors</i>           |         |       |       |         |       |       |         |       |       |         |       |       |
| BMI                           |         |       |       | 0.059   | 0.017 | 0.001 | 0.060   | 0.018 | 0.001 | 0.059   | 0.018 | 0.002 |
| MAP                           |         |       |       | 0.060   | 0.011 | 0.000 | 0.060   | 0.011 | 0.000 | 0.060   | 0.011 | 0.000 |
| G                             |         |       |       | -0.015  | 0.014 | 0.284 | -0.014  | 0.015 | 0.288 | -0.014  | 0.013 | 0.295 |
| LDL-C                         |         |       |       | -0.002  | 0.004 | 0.643 | -0.002  | 0.004 | 0.621 | -0.001  | 0.004 | 0.840 |
| <i>Efflux parameter</i>       |         |       |       |         |       |       |         |       |       |         |       |       |
| HDL-C                         |         |       |       |         |       |       | 0.003   | 0.009 | 0.759 | 0.001   | 0.009 | 0.950 |
| ABCA1-CEC                     |         |       |       |         |       |       |         |       |       | -0.159  | 0.096 | 0.099 |
| Constant                      | 4.315   | 0.507 | 0.000 | -0.120  | 1.440 | 0.934 | -0.278  | 1.495 | 0.853 | 0.288   | 1.514 | 0.849 |
| Observations                  | 113     |       |       | 113     |       |       | 113     |       |       | 113     |       |       |
| R <sup>2</sup> <sub>adj</sub> | 0.221   |       |       | 0.444   |       |       | 0.440   |       |       | 0.453   |       |       |
| Log-likelihood                | -177.3  |       |       | -155.5  |       |       | -155.4  |       |       | -154.1  |       |       |
| LR test (p-value)             | <0.001  |       |       | <0.001  |       |       | 0.769   |       |       | 0.104   |       |       |

BMI, Body Mass Index; MAP, Mean Arterial Pressure; FPG, Fasting Plasma Glucose; LDL-C, Low Density Lipoprotein Cholesterol; HDL-C, High Density Lipoprotein Cholesterol; ABCA1, ABCA1-dependent CEC.

## Figure Legends

**Figure 1S: Correlation between PWV and ABCA1-dependent CEC.** PWV = carotid-femoral Pulse Wave Velocity, ABCA1 = ABCA1-dependent CEC (%) after a 4h incubation with 2% individual serum.

**Figure 2S: Correlation between PWV and serum HDL-C.** PWV = carotid-femoral Pulse Wave Velocity, HDL (mg/dL) = serum HDL-C.

**Figure 1S**

**Males**

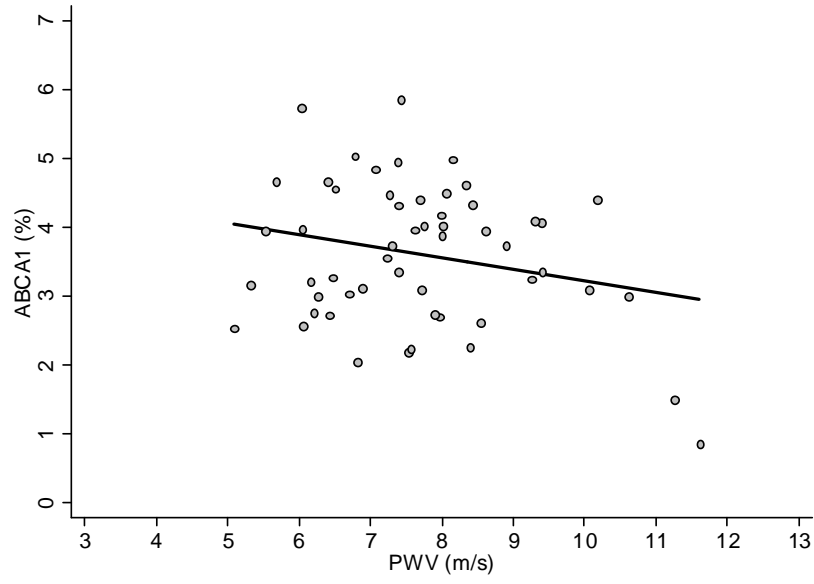

**Females**

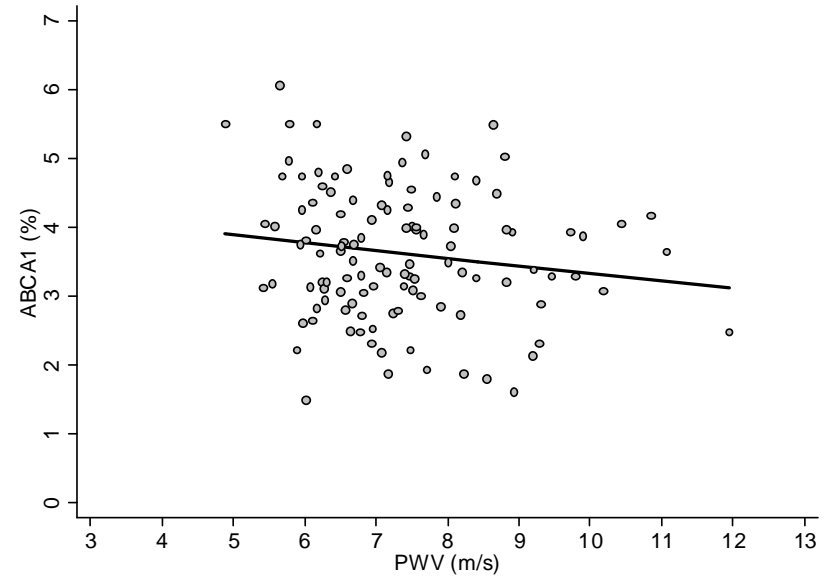

**Figure 2S**

**Males**

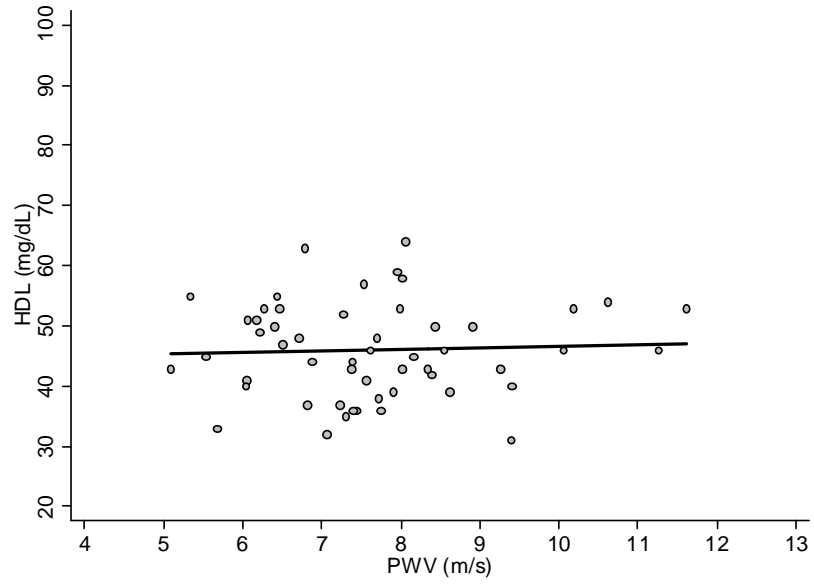

**Females**

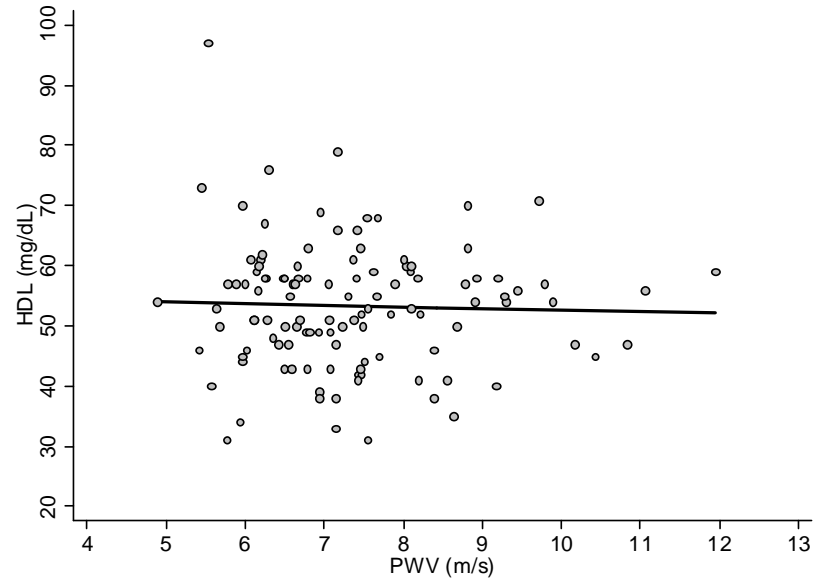

Supplement: supp_P030452_jlr.P030452-1.pdf [file supp_P030452_jlr.P030452-1.pdf]
